# Supplementary material for: PXR Functionally Interacts with NF-κB and AP-1 to Downregulate the Inflammation-Induced Expression of Chemokine CXCL2 in Mice
Source: MDPI journal article supplement (doi:10.3390/cells9102296), 2020-10-15
Supplement: s1 [file s1]

Figure S1

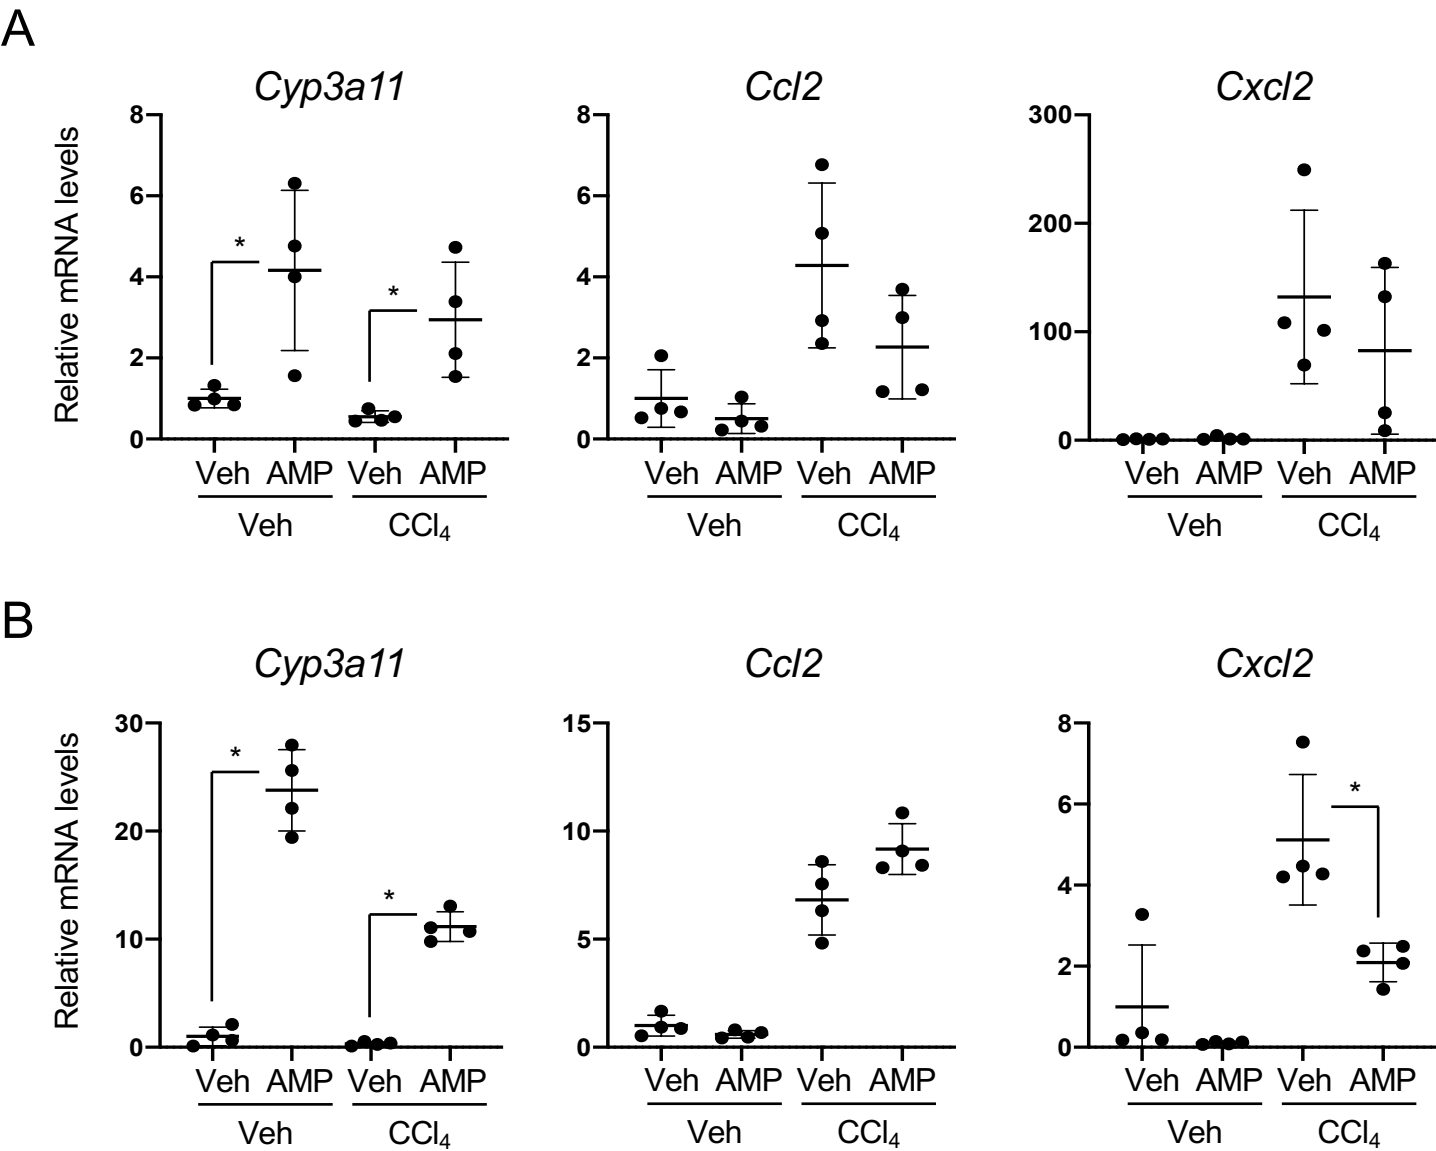

**Figure S1.** Effect of amprenavir treatment on CCl<sub>4</sub>-dependent induction of the hepatic mRNA levels of *Ccl2* and *Cxcl2* in mice. Mice were intraperitoneally treated with vehicle (Veh, corn oil) or amprenavir (AMP, 100 mg/kg) and 6 h later with vehicle (Veh, corn oil) or CCl<sub>4</sub> (0.5 mL/kg). The mice were killed at 3 (A) or 24 h (B) after CCl<sub>4</sub> treatment. Total RNA from the livers was prepared and subjected to qRT-PCR. The mRNA levels of the target genes were normalized to 18S rRNA levels and are shown as relative values with that of the vehicle-treated mice as 1. Data are presented as mean ± S.D. with the plots of individual mouse data (n=4). \**P* < 0.05 (Student's *t*-test).
