# Supplementary material for: PXR Functionally Interacts with NF-κB and AP-1 to Downregulate the Inflammation-Induced Expression of Chemokine CXCL2 in Mice
Source: Cells. 2020 Oct 15;9(10):2296. doi: 10.3390/cells9102296 (PMC7602528; doi:10.3390/cells9102296)
Supplement: Supplementary file 1 [file cells-09-02296-s001.zip]

Archive with 4 entries (4 files):
- FigureS1.pdf
- __MACOSX/._FigureS1.pdf
- TableS1.docx
- __MACOSX/._TableS1.docx
